# Supplementary material for: Macrophages Impair TLR9 Agonist Antitumor Activity through Interacting with the Anti-PD-1 Antibody Fc Domain
Source: Cancers (Basel). 2021 Aug 13;13(16):4081. doi: 10.3390/cancers13164081 (PMC8391891; doi:10.3390/cancers13164081)
Supplement: Supplementary file 1 [file cancers-13-04081-s001.zip]

Archive with 12 entries (12 files):
- Figure S1.tif
- Figure S2.tif
- Figure S3.tif
- Figure S4.tif
- Figure S5.tif
- Figure S6.tif
- Figure S7.tif
- Figure S8.tif
- Figure S9.tif
- Supplementary Figure Legends Revised.pdf
- Table S1.pdf
- Table S2.pdf
