# Supplementary material for: Macrophages Impair TLR9 Agonist Antitumor Activity through Interacting with the Anti-PD-1 Antibody Fc Domain
Source: Cancers (Basel). 2021 Aug 13;13(16):4081. doi: 10.3390/cancers13164081 (PMC8391891; doi:10.3390/cancers13164081)
Supplement: Supplementary file 1 [file cancers-13-04081-s001.zip › Table S1.pdf]

| Gene Symbol   | Assay ID      |
|---------------|---------------|
| $\beta$ 2m    | Mm00437762_m1 |
| Ccl1          | Mm00441236_m1 |
| Ccl2          | Mm00441242_m1 |
| Cd80          | Mm00711660_m1 |
| Cd86          | Mm00444540_m1 |
| Fcgr1         | Mm00438874_m1 |
| Fcgr2b        | Mm00438875_m1 |
| Fcgr3         | Mm01290525_m1 |
| Fcgr4         | Mm07300046_g1 |
| Il1b          | Mm00434228_m1 |
| Il6           | Mm00446190_m1 |
| Il12b         | Mm00434174_m1 |
| Il-10         | Mm01288386_m1 |
| Irf4          | Mm00516431_m1 |
| Irf5          | Mm00496477_m1 |
| Mertk         | Mm00434920_m1 |
| Nos2          | Mm00440502_m1 |
| Pdcd1         | Mm00435532_m1 |
| Socs1         | Mm00782550_s1 |
| Socs2         | Mm05820064_g1 |
| Stat1         | Mm01257286_m1 |
| Stat6         | Mm01160477_m1 |
| Tnf- $\alpha$ | Mm00443258_m1 |

**Table S1.** List of TaqMan® gene expression assays utilized for Real Time PCR analysis
